# Supplementary material for: Icaritin suppresses CAD-mediated liver cancer development by targeting miR-18b-5p in a xenograft mouse model
Source: Research Square preprint supplement (doi:10.21203/rs.3.rs-7606192/v1), 2025-11-17
Supplement: Supplementary file 1 [file 3934c41b24c6920662d339f6.docx]

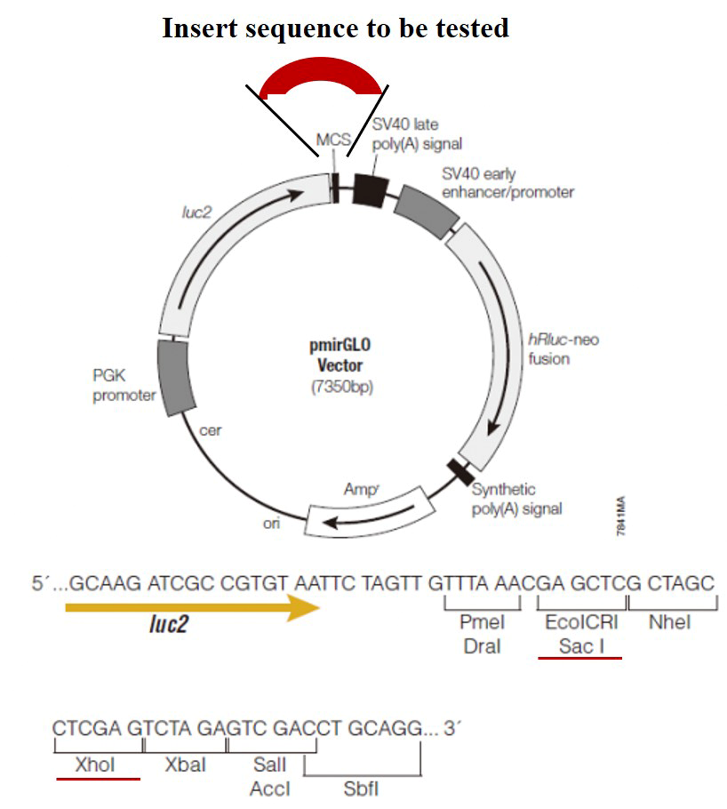


**Fig. S1** Schematic diagram of the pmirGLO Dual-Luciferase miRNA Target Expression Vector. Rluc: sea kidney luciferase cDNA; Luc2: firefly luciferase cDNA; Ampr: gene coding for ampicillin resistance in E. coli; ori: E. coli replication initiation site; arrowheads in Rluc, Luc2, and Ampr are in the direction of transcription; Insert sequence to be tested: insertion of cDNA of the target sequence to be tested in the polyclonal site region.


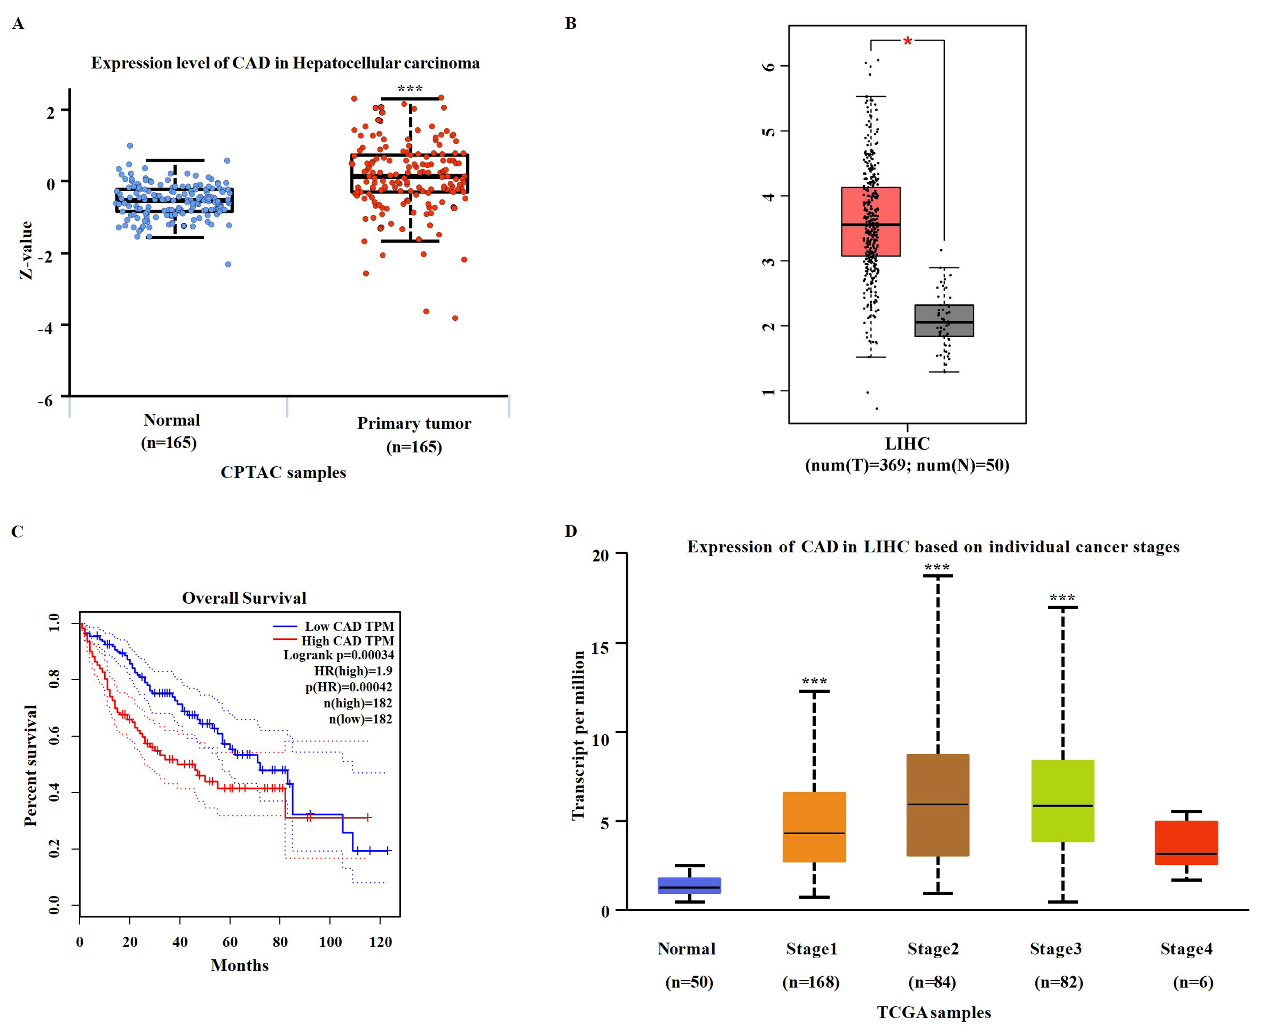


**Fig. S2** CAD expression in human liver cancer tissues (UALCAN and GEPIA databases). (A) CAD protein expression levels in human liver cancer tissues compared to normal tissues, ****P*<0.001 vs Normal. (B) CAD mRNA levels in liver cancer tissues versus normal tissues, **P*<0.05 vs Normal. (C) Kaplan-Meier survival analysis of liver cancer patients stratified by high vs low CAD expression, ****P*<0.001, log-rank test. (D) CAD expression across different tumor stages, ****P*<0.001 vs Normal.
